# Supplementary material for: Hollow 0.3Li2MnO3·0.7LiNi0.5Mn0.5O2 microspheres as a high-performance cathode material for lithium–ion batteries
Source: Royal Society of Chemistry journal article supplement (doi:10.1039/c2cp44394e), 2013-01-01
Supplement: c2cp44394e.pdf [file c2cp44394e.pdf]

## Supplementary Information

### Hollow $0.3\text{Li}_2\text{MnO}_3 \cdot 0.7\text{LiNi}_{0.5}\text{Mn}_{0.5}\text{O}_2$ microspheres as a high-performance cathode material for lithium-ion batteries

Yan Jiang, Ze Yang, Wei Luo, Xianluo Hu\* and Yunhui Huang\*

State Key Laboratory of Material Processing and Die & Mould Technology, School of Materials Science and Engineering,

Huazhong University of Science and Technology, Wuhan 430074, P. R. China.

Fax: +86 -27-87558241; Tel: +86 -27-87558241

E-mail: [huxl@mail.hust.edu.cn](mailto:huxl@mail.hust.edu.cn), [huangyh@mail.hust.edu.cn](mailto:huangyh@mail.hust.edu.cn).

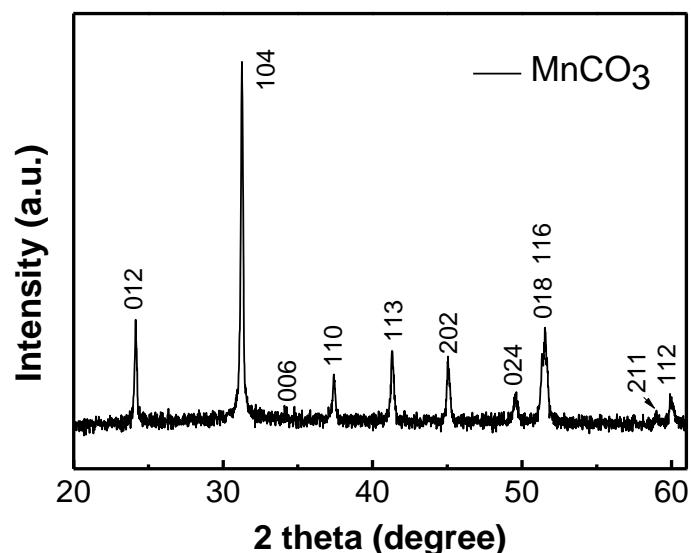

**Fig.S1** A representative XRD pattern of precursor  $\text{MnCO}_3$  prepared by co-precipitation. The diffraction peaks could be well indexed to a pure rhombohedral phase of  $\text{MnCO}_3$  (JCPDS No. 44-1472).

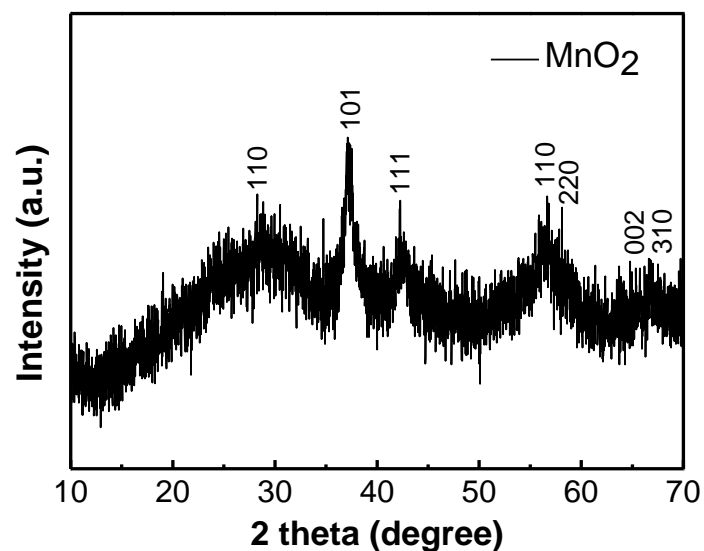

**Fig.S2** A representative XRD pattern of the intermediate product of porous MnO<sub>2</sub> prepared by heating MnCO<sub>3</sub> at 400 °C for 5 h in air. The diffraction peaks could be well indexed to a pure tetragonal phase of MnO<sub>2</sub> (JCPDS No. 01-0799).

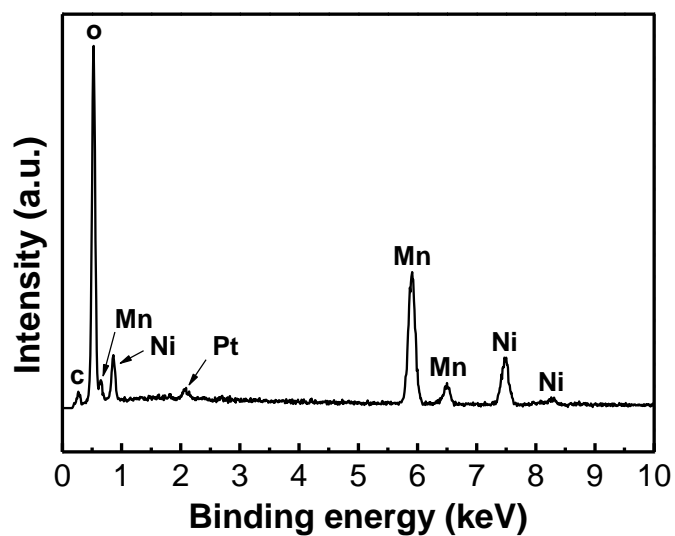

**Fig. S3** EDX spectrum of the 0.3Li<sub>2</sub>MnO<sub>3</sub>•0.7LiNi<sub>0.5</sub>Mn<sub>0.5</sub>O<sub>2</sub> product, where the signal of C is generated from the sample holder.

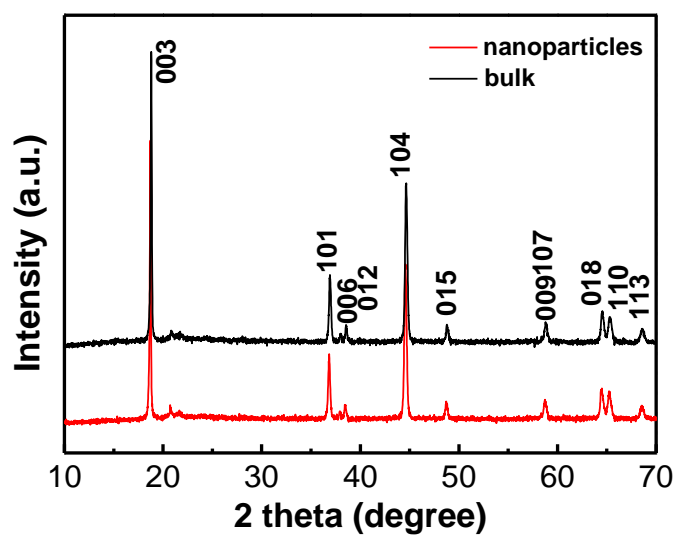

**Fig. S4** XRD patterns for the  $0.3\text{Li}_2\text{MnO}_3 \cdot 0.7\text{LiNi}_{0.5}\text{Mn}_{0.5}\text{O}_2$  products prepared by a sol-gel method (nanoparticles) and a solid state reaction (bulk), respectively.

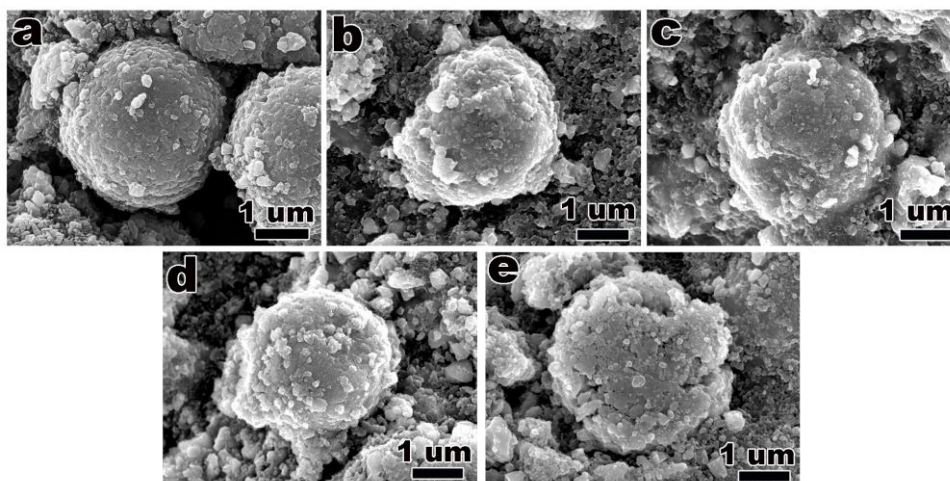

**Fig. S5** FESEM images for the electrodes before cycling (a) and after 200 discharge/charge cycles at 55 °C at the current densities of (b) 50 (c) 100 (d) 200, and (e) 500 mA g<sup>-1</sup>, respectively. The smaller particles are acetylene black.
